# Supplementary material
Source: publisher figshare collection journal article supplement (https://frontiersin.figshare.com/ndownloader/files/13824980)
Supplement: Supplementary file [file 13824980]

# Supplemental Figure 1

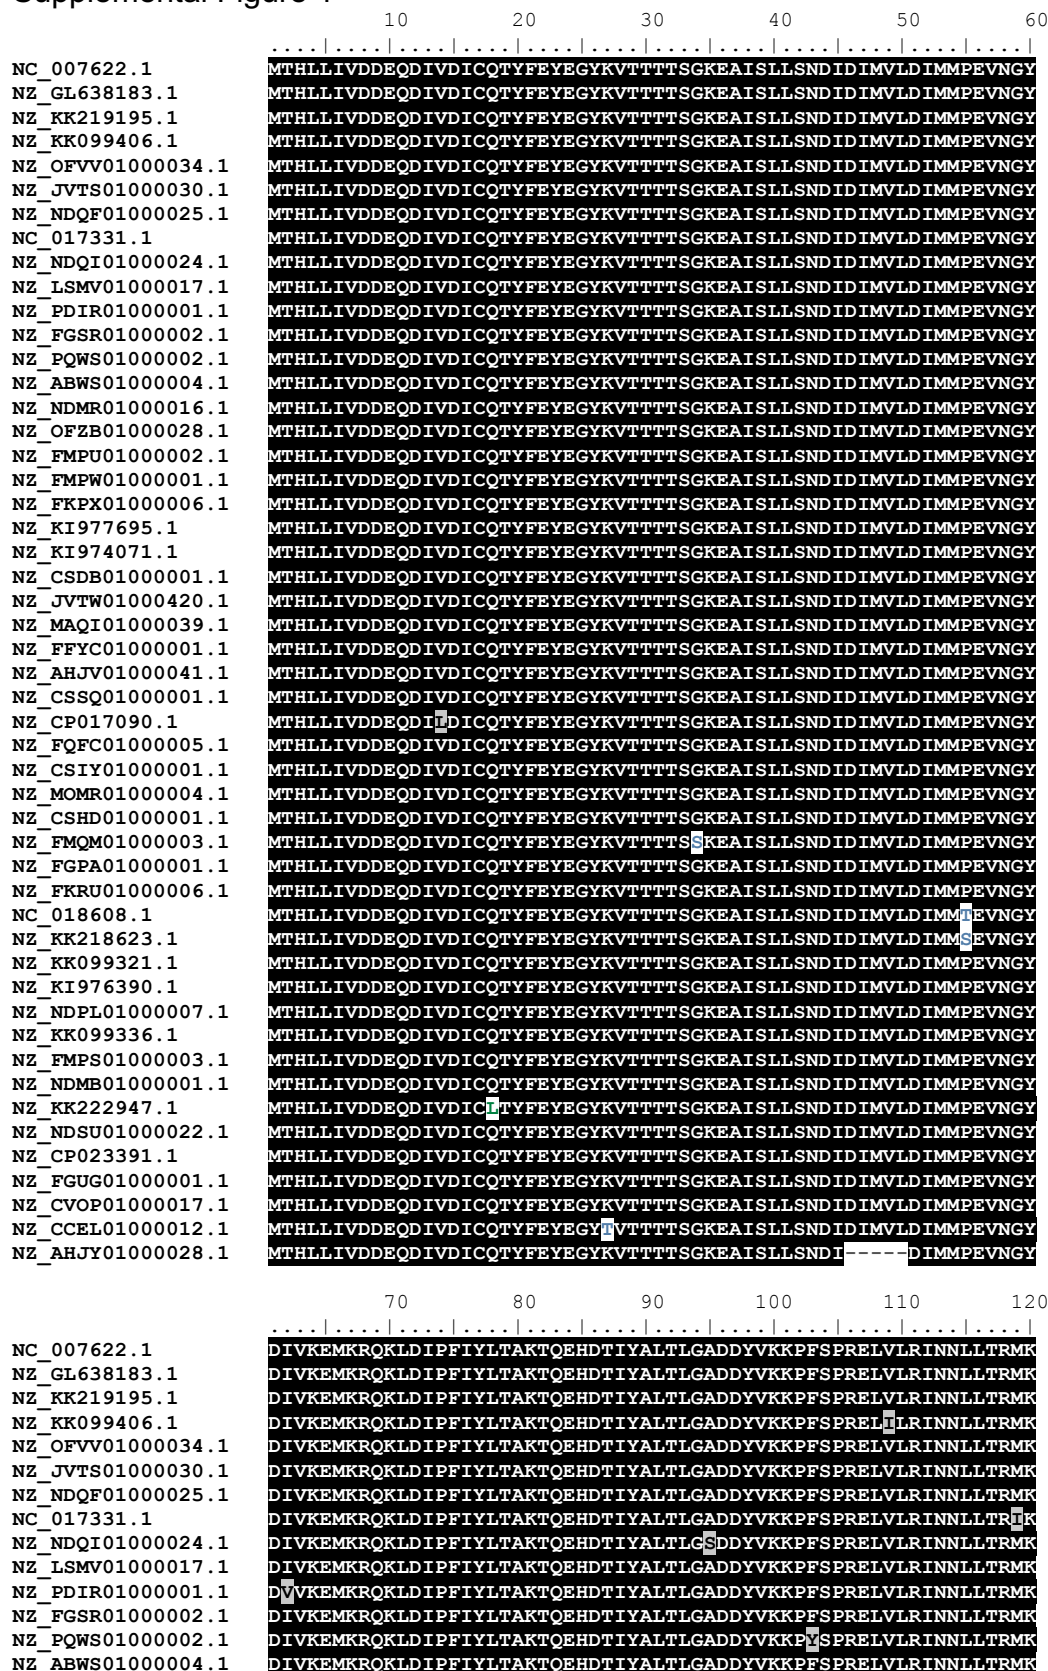

[illegible][illegible]

[illegible][illegible]
